# Supplementary material
Source: publisher site journal article supplement (https://www.dovepress.com/article/576823)
Supplement: Supplementary file 1 [file 576823_Annex1_1.pdf]

## Opinion Survey on Pain and Pain Treatment Methods

### 1. How much does the idea of having pain scare or bother you?

*(Please mark using X)*

|   |   |   |   |   |   |   |   |   |   |    |
|---|---|---|---|---|---|---|---|---|---|----|
| 0 | 1 | 2 | 3 | 4 | 5 | 6 | 7 | 8 | 9 | 10 |
|---|---|---|---|---|---|---|---|---|---|----|

**0 – It doesn't scare me at all  
terribly**

**10 – It scares me**

### 2. Would you be willing to take morphine (an opioid medication) if your pain required this type of treatment and your doctor recommended it?

*(Please choose one answer)*

- " Definitely, I would do anything to avoid pain.
- " Yes, under certain conditions
- " I would take anything, but NOT morphine!
- " Other (please specify): .....

### 3. If there were a study in Romania testing a new pain medication, do you think you would participate in this study?

*(Please choose one answer)*

- " Very unlikely
- " Unlikely
- " Not sure
- " Likely
- " Very likely

### 4. Would you be willing to use alternative methods (e.g., dietary supplements/mushrooms/vitamins/various remedies) to treat your pain?

*(Please choose one answer)*

- " Definitely, I would do anything to avoid pain!
- " Yes, but only with my doctor's approval!
- " No, I don't trust products that aren't recognized and approved medications!
- " Other (please specify): .....

### 5. Would you be willing to use non-medication methods (such as acupuncture, physiotherapy/electrical nerve stimulation) to treat your pain?

ANNEX 1

*(Please choose one answer)*

- " Definitely, I would do anything to avoid pain!
- " Yes, but only with my doctor's approval!
- " No, I don't trust techniques that don't involve medication!
- " Other (please specify): .....

**6. If there were a study in Romania testing a new non-medication method for pain relief, do you think you would participate in this study?**

*(Please choose one answer)*

- " Very unlikely
- " Unlikely
- " Not sure
- " Likely
- " Very likely

**7. You could access a new pain treatment method: Transcranial stimulation using direct current. Would you be willing to try this method for pain relief?**

*(Please choose one answer)*

- " Definitely, I would do anything to avoid pain!
- " Yes, but only with my doctor's approval!
- " No, I don't trust techniques that don't involve medication!
- " Other (please specify): .....

**8. If there were a study in Romania using transcranial electrical stimulation (tDC S), do you think you would participate in this study?**

*(Please choose one answer)*

- " Very unlikely
- " Unlikely
- " Not sure
- " Likely
- " Very likely

**9. What factors would encourage you to use transcranial direct current stimulation (tDCS) as a pain treatment?**

*(! you may choose multiple answers)*

- " It's a new/modern method.
- " I believe it's effective because it uses a stimulus that modulates brain activity, and pain is controlled by the brain.
- " I have more trust in non-medication methods.
- " I would use any method to avoid pain.
- " I have nothing to lose.
- " None, I don't want to use this technique.
- " Other (please specify): .....

**10. What factors make you hesitant or opposed to using transcranial direct current stimulation (tDCS) for pain treatment?**

*(! you may choose multiple answers)*

- " It's a new method I've never heard of. I'm not open to new things.
- " I don't trust techniques that don't involve medication.
- " The method uses electrical current, which scares me.
- " Electrodes are applied to the head.
- " I don't understand how it works.
- " I don't believe it's effective.
- " I think it could harm me.
- " None, I want to try this method.
- " Other (please specify): .....
